# Supplementary material for: Genetic Markers in S. Paratyphi C Reveal Primary Adaptation to Pigs
Source: MDPI journal article supplement (doi:10.3390/microorganisms8050657), 2020-04-30
Supplement: s1 [file s1]

### Additional strains from Enterobase
